# Supplementary material for: DNA barcode reference library construction and genetic diversity and structure analysis of Amomum villosum Lour. (Zingiberaceae) populations in Guangdong Province
Source: PeerJ. 2021 Oct 20;9:e12325. doi: 10.7717/peerj.12325 (PMC8541303; doi:10.7717/peerj.12325)
Supplement: Supplemental Information 3 [file peerj-09-12325-s003.xlsx]

## Sheet: number
Table S2 Genbank accession numbers of DNA barcodes.
Sampels	ITS2	psbA-trnH	ITS	matK	rbcL
ZJD-1	MT903619		MT907294		MW034439
ZJD-2	MT903620		MT907295		MW034440
ZJD-3	MT903621		MT907296		MW034441
ZJD-4	MT903622		MT907297		MW034442
ZJD-5	MT903623		MT907298		MW034443
ZJD-6	MT903624	MT904092	MT907307		MW034444
ZJD-7	MT903625	MT904093	MT907299		MW034445
ZJD-8	MT903626		MT907300		MW034446
ZJD-9	MT903627	MT904094	MT907301		MW034447
ZJD-10	MT903628		MT907302		MW034448
ZJD-11	MT903629		MT907303		MW034449
ZJD-12	MT903630		MT907304		MW034450
ZJD-13		MT904095	MT907305		MW034451
ZJD-14	MT903631	MT904096	MT907306		MW034452
ZJD-16	MT903632	MT904097	MT907308		MW034454
ZJD-17	MT903633	MT904098	MT907309		MW034455
ZJD-18	MT903634		MT907310		MW034456
ZJD-19	MT903635	MT904099	MT907311		MW034457
ZJD-20	MT903636	MT904100	MT907312		MW034458
ZJD-21	MT903637	MT904101	MT907313		MW034459
ZJD-22	MT903638		MT907314		MW034460
ZJD-23	MT903639	MT904102	MT907315		MW034461
ZJD-24	MT903640		MT907316		MW034462
ZJD-25	MT903641		MT907317		MW034463
ZJD-26	MT903642	MT904103	MT907318		MW034464
ZJD-27	MT903643	MT904104	MT907319		MW034465
ZJD-28	MT903644	MT904105	MT907320		MW034466
ZJD-29	MT903645		MT907321		MW034453
ZJD-30	MT903646	MT904106	MT907322		MW034467
ZJD-31	MT903647	MT904107	MT907323		MW034468
ZJD-32	MT903648		MT907324		MW034469
ZJD-33	MT903649		MT907325		MW034470
ZJD-34		MT904108	MT907326		MW034471
TK-1	MT903650		MT907327		MW034472
TK-2	MT903651		MT907328		MW034473
TK-3	MT903652		MT907329		MW034474
TK-4	MT903653		MT907330		MW034475
TK-5	MT903654		MT907331		MW034476
TK-6	MT903655		MT907332		MW034477
TK-7	MT903656		MT907333	MW012588	MW034478
TK-8	MT903657		MT907334	MW012589	MW034479
TK-9	MT903658		MT907335	MW012590	MW034480
TK-10	MT903659	MT904109	MT907336	MW012591	MW034481
TK-11	MT903660		MT907337		MW034482
TK-12	MT903661		MT907338	MW012592	MW034483
TK-13	MT903662		MT907339	MW012593	MW034484
TK-14	MT903663		MT907340	MW012594	MW034485
TK-15	MT903664		MT907341	MW012595	MW034486
TK-16	MT903665		MT907342	MW012596	MW034487
ZY-1	MT903666	MT904110	MT907343		MW034488
ZY-2	MT903667	MT904111	MT907344		MW034501
ZY-3	MT903668	MT904112	MT907345		MW034489
ZY-4	MT903669	MT904113	MT907346		MW034490
ZY-5	MT903670	MT904114	MT907347	MW012597	MW034491
ZY-6			MT907348		MW034492
ZY-7	MT903671		MT907349		MW034493
ZY-8	MT903672	MT904115	MT907350		MW034494
ZY-9	MT903673	MT904116	MT907351		MW034495
ZY-10	MT903674	MT904117	MT907352		MW034496
ZY-13	MT903675	MT904118	MT907353		MW034497
ZY-14	MT903676		MT907354		MW034498
ZY-17	MT903677	MT904119	MT907355		MW034499
ZY-19	MT903678		MT907356		MW034500
ZY-21	MT903679	MT904120	MT907357		MW034502
ZY-22	MT903680	MT904121	MT907358		MW034503
ZY-23	MT903681	MT904122	MT907359		MW034504
ZY-24	MT903682		MT907360		MW034505
ZY-25	MT903683		MT907361		MW034506
ZY-26	MT903684		MT907362		MW034507
ZY-27	MT903685		MT907363		MW034508
ZY-28	MT903686	MT904123	MT907364		MW034509
ZY-29	MT903687	MT904124	MT907365		MW034510
ZY-30	MT903688	MT904125	MT907366		MW034511
ZY-31	MT903689		MT907367		MW034512
XFC-1	MT903690	MT904126	MT907368	MW012598	MW034513
XFC-2	MT903691		MT907369		MW034514
XFC-3	MT903692	MT904127	MT907370	MW012599	MW034515
XFC-4	MT903693	MT904128	MT907371	MW012600	MW034516
XFC-5	MT903694	MT904129	MT907372		MW034517
XFC-6	MT903695		MT907373		MW034518
XFC-7	MT903696	MT904130	MT907374	MW012601	MW034519
XFC-8	MT903697	MT904131	MT907375	MW012602	MW034520
XFC-9	MT903698	MT904132	MT907376	MW012603	MW034521
XFC-10	MT903699	MT904133	MT907377	MW012604	MW034522
XFC-11	MT903700	MT904134	MT907378		MW034523
XFC-12	MT903701	MT904135	MT907379		MW034524
XFC-13	MT903702	MT904136	MT907380		MW034525
XFC-14	MT903703	MT904137	MT907381		MW034526
XFC-15	MT903704	MT904138	MT907382	MW012605	MW034527
XFC-16	MT903705	MT904139	MT907383		MW034528
XFC-17	MT903706	MT904140	MT907384		MW034529
XFC-18	MT903707	MT904141	MT907385		MW034530
GY-1			MT907386	MW012606	MW034538
GY-3	MT903708		MT907387		MW034531
GY-4	MT903709		MT907388	MW012607	MW034540
GY-5	MT903710		MT907389		MW034541
GY-6	MT903711		MT907390		MW034532
GY-7	MT903712		MT907391		MW034533
GY-8			MT907392		MW034534
GY-9	MT903713	MT904142	MT907393		MW034539
GY-10	MT903714		MT907394		MW034535
GY-11	MT903715		MT907395		MW034536
GY-12	MT903716	MT904143	MT907396	MW012608	MW034537
GY-14	MT903717		MT907398	MW012609	MW034542
GY-15	MT903718	MT904144	MT907399		MW034543
GY-16	MT903719	MT904145	MT907400	MW012610	MW034544
GY-17	MT903720	MT904146	MT907401		MW034545
GY-18	MT903721	MT904147	MT907402		MW034546
GY-19	MT903722	MT904148	MT907403		MW034547
GY-20	MT903723	MT904149	MT907404		MW034548
GY-21	MT903724	MT904150	MT907405		MW034549
MM-1	MT903725	MT904151	MT907406	MW012611	MW034550
MM-2	MT903726	MT904152	MT907407		MW034551
MM-3	MT903727	MT904153	MT907408		MW034552
MM-4	MT903728		MT907409		MW034553
MM-5	MT903729		MT907410		MW034554
MM-6	MT903730	MT904154	MT907411		MW034555
MM-7	MT903731	MT904155	MT907412		MW034556
MM-8	MT903732	MT904156	MT907413		MW034557
MM-9	MT903733		MT907414		MW034558
MM-10	MT903734	MT904157	MT907415		MW034559
YC-1	MT903753	MT904164	MT907397		MW034578
YC-2	MT903743	MT904165	MT907417		MW034560
YC-3	MT903748		MT907424		MW034569
YC-4	MT903749	MT904166	MT907416		MW034576
YC-5	MT903750		MT907421		MW034572
YC-6	MT903738	MT904158	MT907422		MW034573
YC-7	MT903751	MT904159			MW034564
YC-8	MT903742	MT904160			MW034562
YC-9	MT903737		MT907429		MW034561
YC-10	MT903752	MT904163	MT907430		MW034567
YC-12	MT903740		MT907419		MW034563
YC-13		MT904161	MT907420		MW034565
YC-14	MT903741		MT907431		MW034566
YC-15	MT903744		MT907427		MW034568
YC-17	MT903739		MT907423		MW034577
YC-18			MT907418		MW034575
YC-19	MT903736		MT907425		MW034574
YC-20	MT903745		MT907426		MW034571
YC-21	MT903746		MT907428		MW034570
YC-22	MT903747	MT904162	MT907432		MW034579
